# Supplementary material for: Virological and immunological correlates of HIV posttreatment control after temporal antiretroviral therapy during acute HIV infection
Source: PubMed Central journal article supplement (PMC10653294; doi:10.1097/qad.0000000000003722), 2023-09-11
Supplement: aids-37-2297-s001.pdf [file aids-37-2297-s001.pdf]

# Supplementary Figures

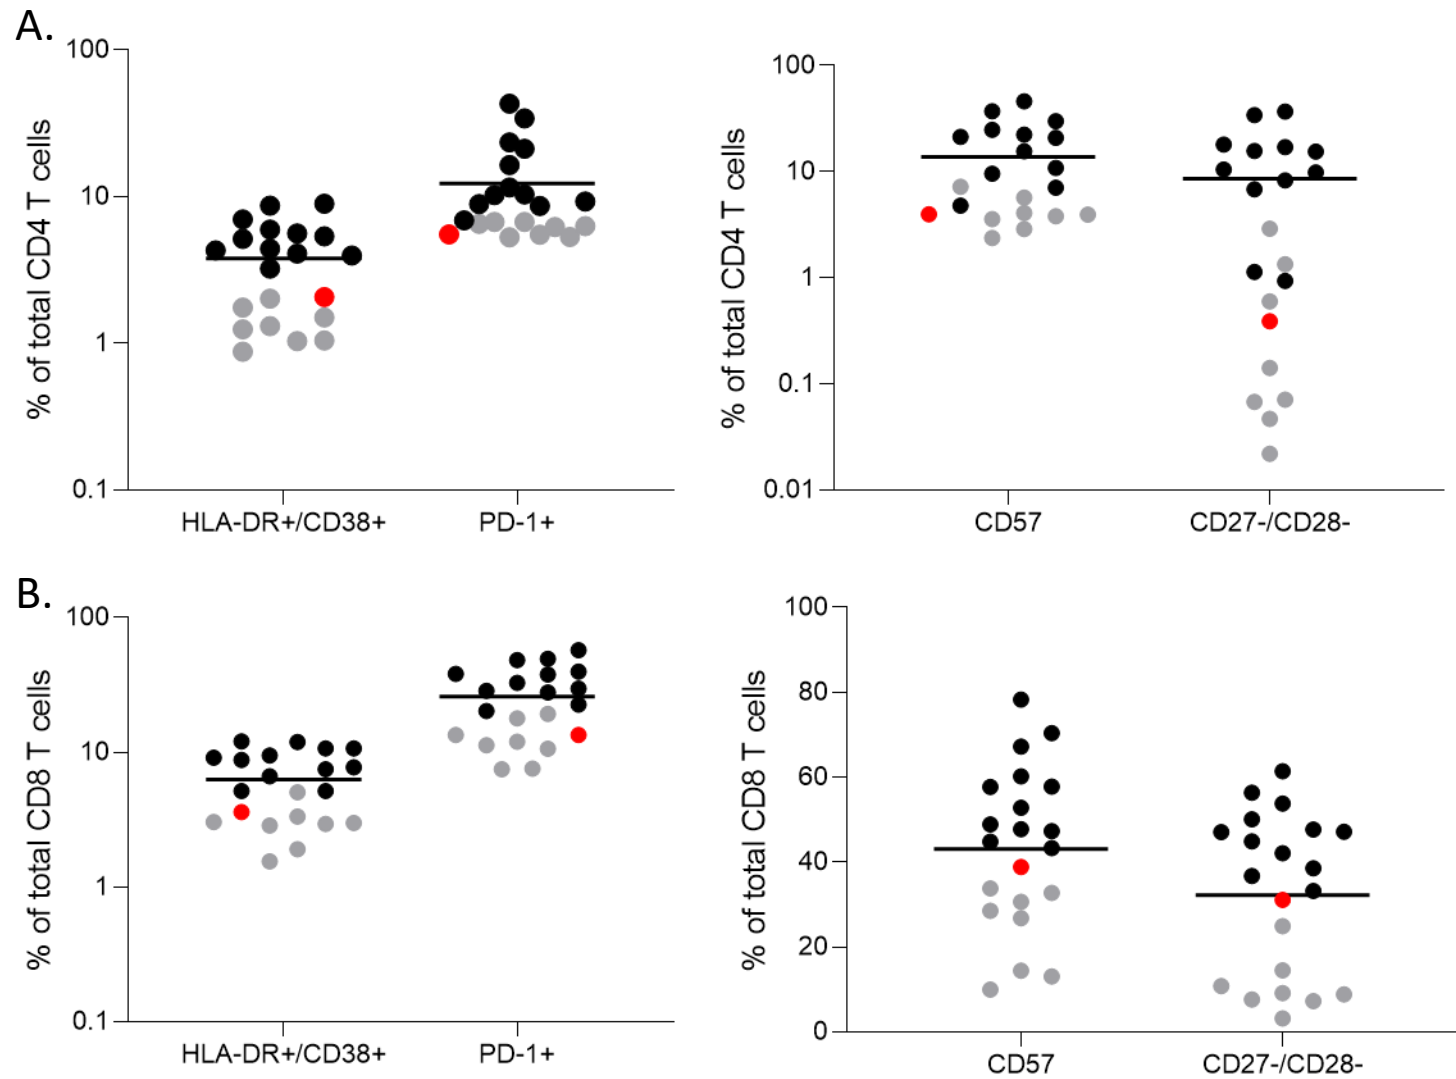

**Supplementary Figure 1. Activation, exhaustion and senescence of CD4 (A) and CD8 (B) T cells.**

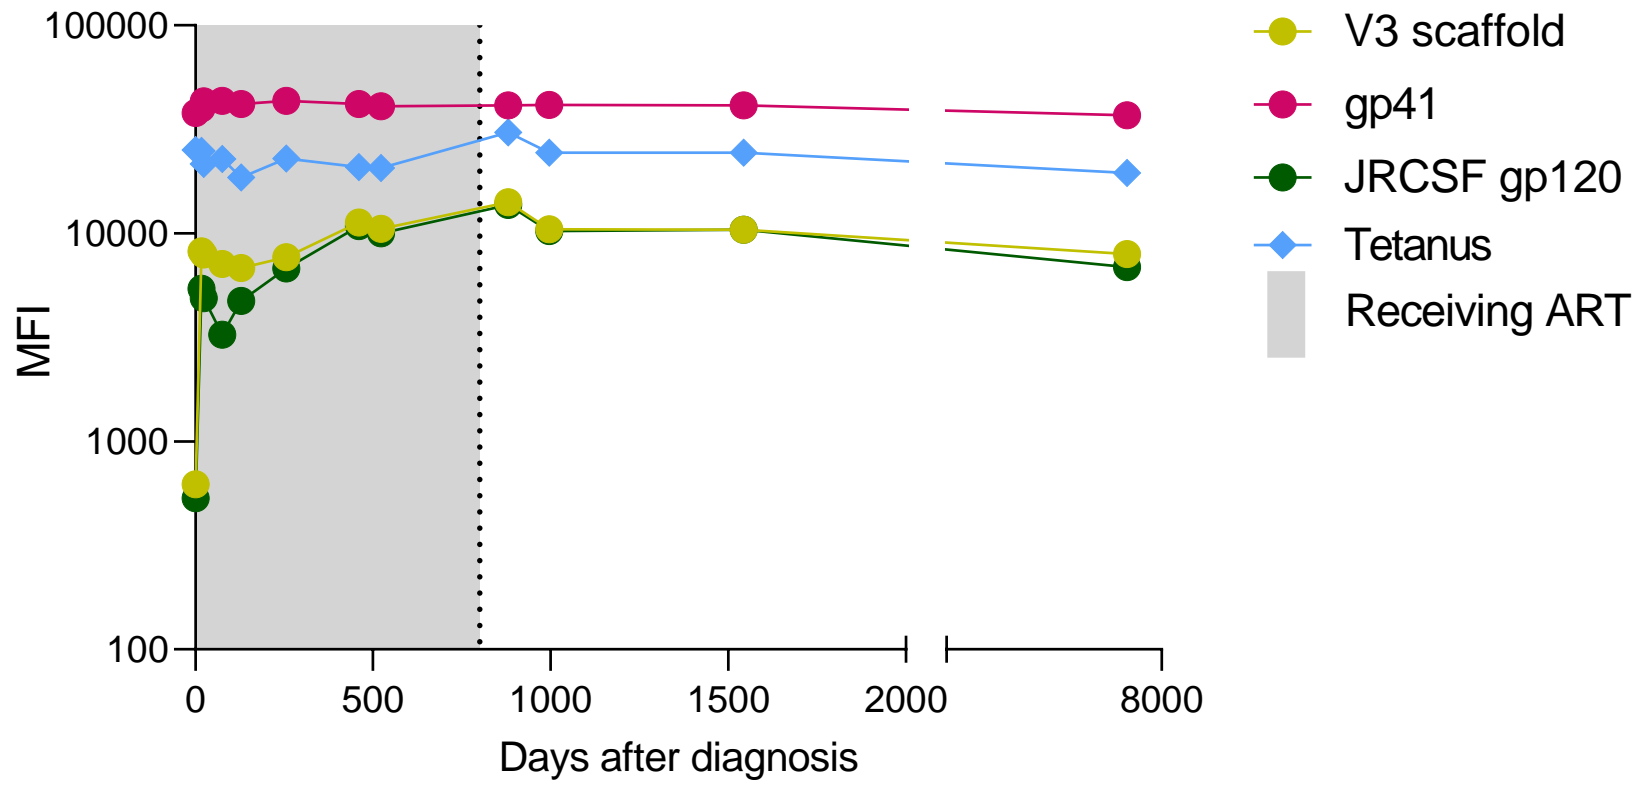

Supplementary Figure 2. IgG antibody responses

A

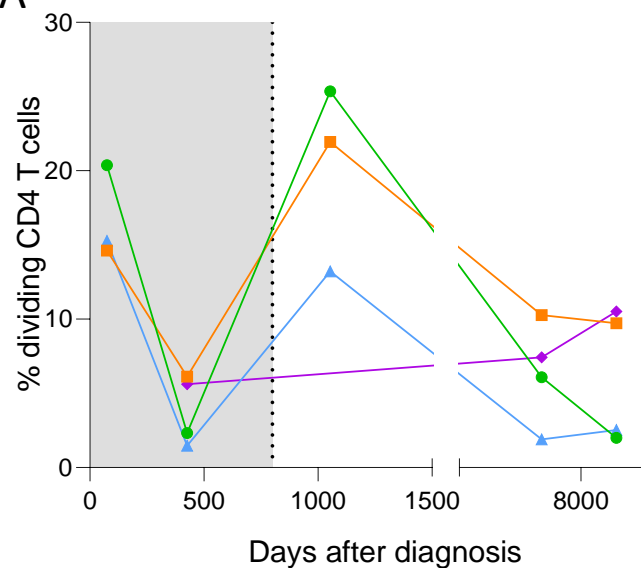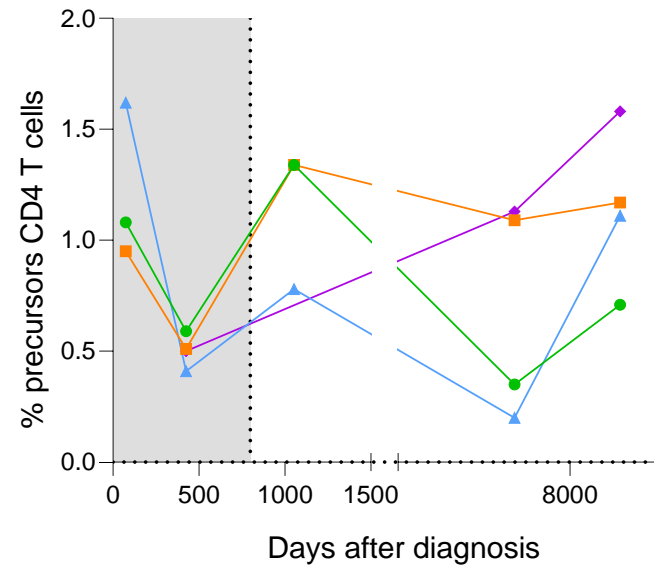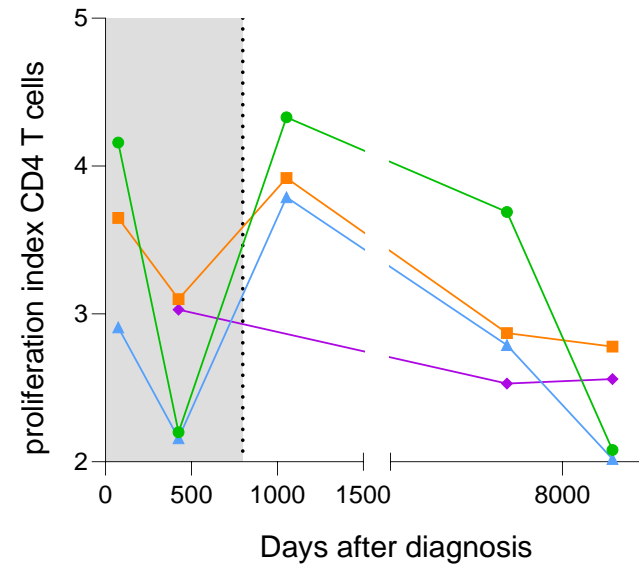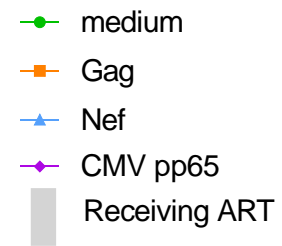

B

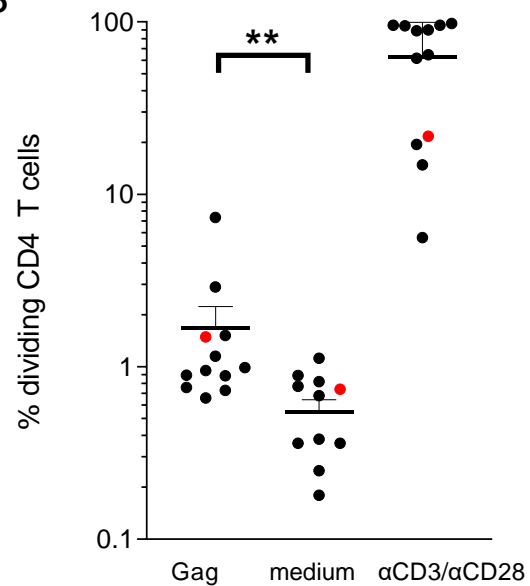

Supplementary Figure 3. HIV specific CD4 T cell response.

**A.**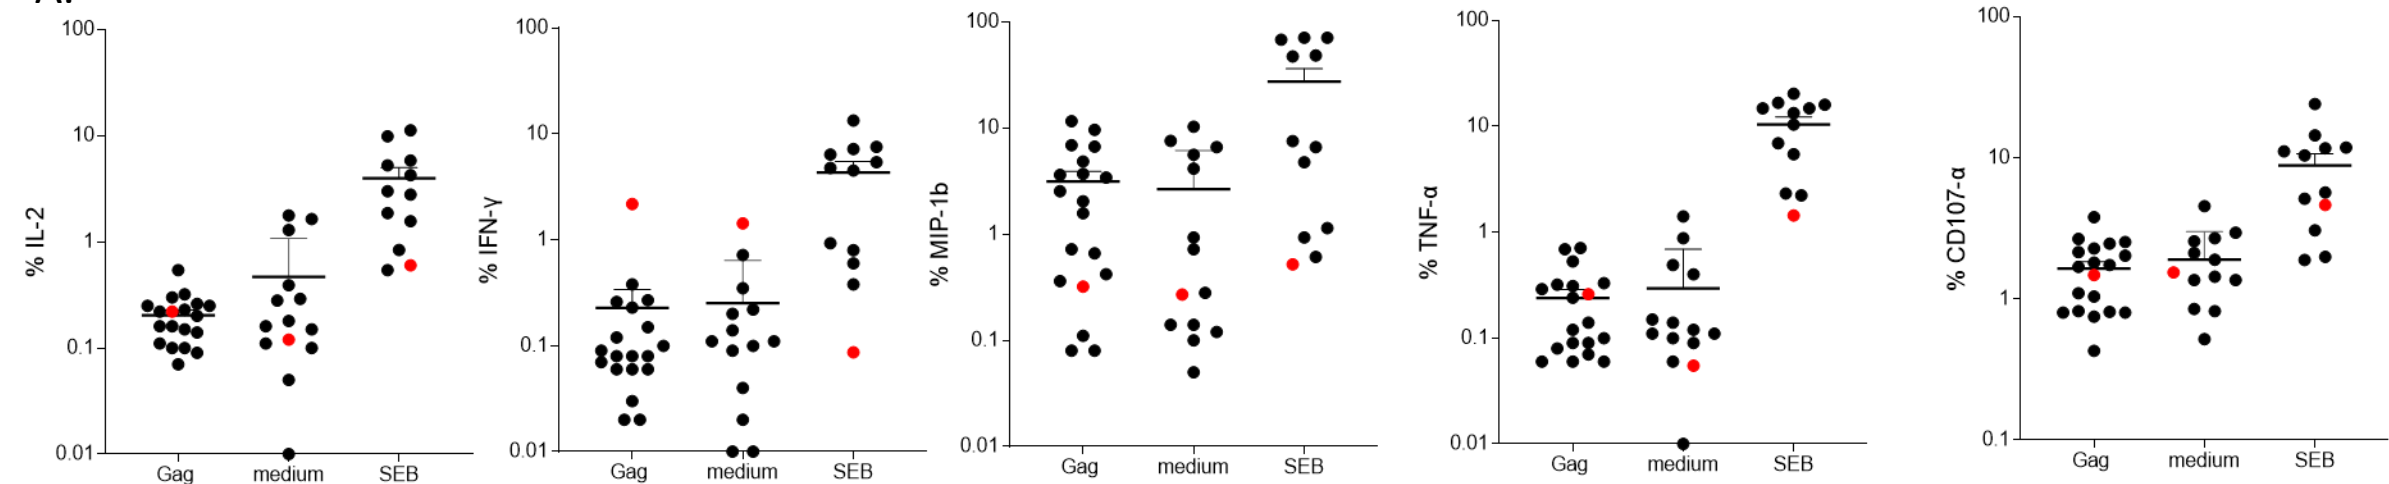**B.**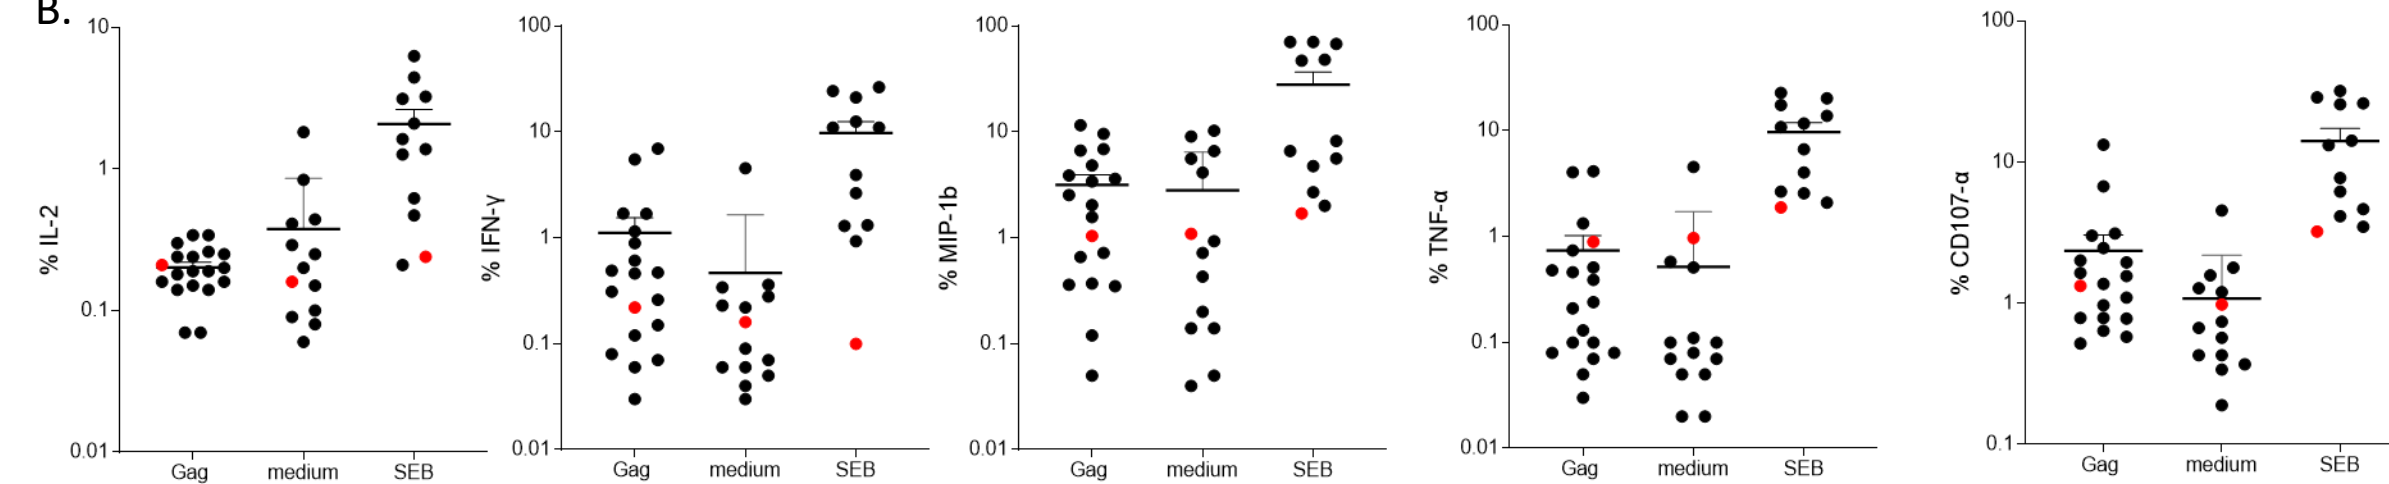**Supplementary Figure 4. T cell functionality**
